# Supplementary material for: Physical Complaints Decrease after Following a Few-Foods Diet in Children with ADHD
Source: MDPI journal article supplement (doi:10.3390/nu14153036), 2022-07-24
Supplement: s1 [file s1]

**Table S1. Spearman rank correlations ( $\rho$ ) between physical complaints at T<sub>start</sub>, grouped in domains, in the combined INCA and BRAIN study (n=162).**

| Domain                      | Complaints           |                      | $\rho$ | P-value |
|-----------------------------|----------------------|----------------------|--------|---------|
| Thermoregulation            | Unusual perspiration | Unusual thirst       | 0.21   | 0.0085  |
|                             | Unusual perspiration | Often warm           | 0.16   | 0.0373  |
|                             | Often warm           | Unusual thirst       | 0.24   | 0.0025  |
| Gastrointestinal complaints | Diarrhoea            | Flatulence           | 0.12   | 0.14    |
|                             | Diarrhoea            | Abdominal pain       | 0.06   | 0.44    |
|                             | Flatulence           | Abdominal pain       | 0.31   | 0.0001  |
| Pain                        | Headache             | Abdominal pain       | 0.09   | 0.25    |
|                             | Headache             | Growing pain         | 0.04   | 0.64    |
|                             | Growing pain         | Abdominal pain       | 0.23   | 0.0026  |
| Fatigue                     | Tired                | Eyebags              | 0.48   | 0.0001  |
|                             | Tired                | Problems sleeping in | 0.16   | 0.0487  |
|                             | Tired                | Problems sleeping on | 0.17   | 0.0310  |
|                             | Eyebags              | Problems sleeping in | 0.16   | 0.0440  |
|                             | Eyebags              | Problems sleeping on | 0.19   | 0.0148  |
|                             | Problems sleeping in | Problems sleeping on | 0.10   | 0.21    |

**Table S2. Distribution and statistical analysis of presence of 21 (INCA FFD group [n=41]) and 23 (BRAIN study [n=79]) physical complaints, scored using the Physical Complaint Questionnaire<sup>1</sup>, comparing responders (score decrease on the ADHD rating scale (ARS)  $\geq 40\%$ ) and non-responders (ARS score decrease  $< 40\%$ ) before (T<sub>start</sub>) and after (T<sub>end</sub>) following the few-foods diet.**

|                                                      | Responders (n=82)           |                           | Non-responders (n=38)       |                           | Association of ARS score decrease (responder vs non-responder) with complaint at T <sub>end</sub> |               | Association of study (BRAIN vs INCA) with complaint at T <sub>end</sub> |         |
|------------------------------------------------------|-----------------------------|---------------------------|-----------------------------|---------------------------|---------------------------------------------------------------------------------------------------|---------------|-------------------------------------------------------------------------|---------|
| Physical complaint                                   | T <sub>start</sub><br>n (%) | T <sub>end</sub><br>n (%) | T <sub>start</sub><br>n (%) | T <sub>end</sub><br>n (%) | Odds ratio (95% CI) <sup>2</sup>                                                                  | P-value       | Odds ratio (95% CI) <sup>2</sup>                                        | P-value |
| Headache                                             | 10 (12.2)                   | 7 (8.5)                   | 2 (5.3)                     | 5 (13.2)                  | 0.54 (0.13; 2.41 )                                                                                | 0.51          | 1.10 (0.26; 5.58 )                                                      | 1.00    |
| Abdominal pain                                       | 19 (23.2)                   | 12 (14.6)                 | 12 (31.6)                   | 8 (21.1)                  | 0.76 (0.25; 2.49 )                                                                                | 0.79          | 1.71 (0.51; 6.74 )                                                      | 0.50    |
| Growing pain                                         | 6 (7.3)                     | 1 (1.2)                   | 4 (10.5)                    | 1 (2.6)                   | 0.47 (0.01; 40.58 )                                                                               | 1.00          | 0.49 (0.01; 42.25 )                                                     | 1.00    |
| Unusual thirst                                       | 26 (31.7)                   | 7 (8.5)                   | 8 (21.1)                    | 5 (13.2)                  | 0.52 (0.11; 2.40 )                                                                                | 0.49          | 3.59 (0.66; 37.52 )                                                     | 0.18    |
| Unusual perspiration (at night or daytime)           | 25 (30.5)                   | 6 (7.3)                   | 13 (34.2)                   | 6 (15.8)                  | 0.52 (0.12; 2.35 )                                                                                | 0.50          | 4.26 (0.52; 199.6 )                                                     | 0.28    |
| Often warm                                           | 43 (52.4)                   | 15 (18.3)                 | 21 (55.3)                   | 7 (18.4)                  | 1.06 (0.35; 3.55 )                                                                                | 1.00          | 1.23 (0.40; 4.09 )                                                      | 0.90    |
| Eczema                                               | 4 (4.9)                     | 1 (1.2)                   | 1 (2.6)                     | 0 (0.0)                   | 0.33 (0.02; infinite)                                                                             | 0.75          | 3.00 (0.00; 57.00 )                                                     | 0.75    |
| Asthma                                               | 0 (0.0)                     | 0 (0.0)                   | 0 (0.0)                     | 0 (0.0)                   | NA <sup>3</sup>                                                                                   | NA            | NA                                                                      | NA      |
| Persisting cold (rhinitis)                           | 5 (6.1)                     | 1 (1.2)                   | 4 (10.5)                    | 1 (2.6)                   | 1.00 (0.01; 117.3 )                                                                               | 1.00          | 1.19 (0.14; infinite)                                                   | 0.45    |
| Blotches in the face                                 | 1 (1.2)                     | 1 (1.2)                   | 0 (0.0)                     | 2 (5.3)                   | 0.24 (0.00; 2.03)                                                                                 | 0.14          | 0.76 (0.09; infinite)                                                   | 0.58    |
| Red edged mouth                                      | 2 (2.4)                     | 2 (2.4)                   | 2 (5.3)                     | 4 (10.5)                  | 0.26 (0.02; 1.94)                                                                                 | 0.24          | 1.81 (0.16; 93.94)                                                      | 1.00    |
| Red ears                                             | 2 (2.4)                     | 1 (1.2)                   | 0 (0.0)                     | 3 (7.9)                   | 0.08 (0.00; 0.58)                                                                                 | <b>0.0165</b> | 0.14 (0.002; 2.92)                                                      | 0.27    |
| Bags under eyes                                      | 9 (11.0)                    | 6 (7.3)                   | 5 (13.2)                    | 6 (15.8)                  | 0.55 (0.12; 2.53 )                                                                                | 0.55          | 5.38 (0.67; 250.2 )                                                     | 0.16    |
| Often tired                                          | 21 (25.6)                   | 23 (28.1)                 | 5 (13.2)                    | 15 (39.5)                 | 0.54 (0.21; 1.35 )                                                                                | 0.21          | 1.13 (0.45; 2.92 )                                                      | 0.94    |
| Diarrhoea                                            | 6 (7.3)                     | 1 (1.2)                   | 1 (2.6)                     | 1 (2.6)                   | 0.39 (0.01; 33.67 )                                                                               | 1.00          | 0.90 (0.10; infinite )                                                  | 0.53    |
| Constipation                                         | 1 (1.2)                     | 2 (2.4)                   | 0 (0.0)                     | 1 (2.6)                   | 0.41 (0.005; 34.24)                                                                               | 1.00          | 0.45 (0.005; 37.78)                                                     | 1.00    |
| Flatulence                                           | 21 (25.6)                   | 4 (4.9)                   | 8 (21.1)                    | 0 (0.0)                   | 2.25 (0.37; infinite)                                                                             | 0.25          | 1.25 (0.08; 73.63 )                                                     | 1.00    |
| Nausea/vomiting                                      | 2 (2.4)                     | 1 (1.2)                   | 0 (0.0)                     | 2 (5.3)                   | 0.23 (0.004; 4.63)                                                                                | 0.49          | (0.81 0.039;51.64)                                                      | 1.00    |
| Problems sleeping in                                 | 24 (29.3)                   | 11 (13.4)                 | 9 (23.7)                    | 6 (15.8)                  | 0.81 (0.23; 3.01 )                                                                                | 0.91          | 1.67 (0.45; 7.74 )                                                      | 0.60    |
| Problems sleeping on                                 | 12 (14.6)                   | 4 (4.9)                   | 6 (15.8)                    | 2 (5.3)                   | 0.97 (0.13; 11.23)                                                                                | 1.00          | 1.14 (0.15; 13.36 )                                                     | 1.00    |
| Nocturnal enuresis                                   | 6 (7.3)                     | 2 (2.4)                   | 4 (10.5)                    | 1 (2.6)                   | 1.29 (0.04; 117.5)                                                                                | 1.00          | 1.00 (0.12; infinite )                                                  | 0.50    |
| <b>Total number of complaints (average; min-max)</b> | 245<br>(2.99; 0-9)          | 108<br>(1.32; 0-6)        | 105<br>(2.76; 0-7)          | 76<br>(2.00; 0-8)         | 0.62 (0.43; 0.90) <sup>4</sup>                                                                    | <b>0.0120</b> | 1.43 (0.94; 2.17) <sup>4</sup>                                          | 0.09    |
| Daytime urinary incontinence <sup>5</sup>            | 3 (6.0)                     | 2 (4.0)                   | 4 (13.8)                    | 3 (10.3)                  | 0.54 (0.04; 7.72)                                                                                 | 0.90          |                                                                         |         |
| Faecal incontinence <sup>5</sup>                     | 1 (2.0)                     | 0 (0.0)                   | 4 (13.8)                    | 0 (0.0)                   | NA                                                                                                | NA            |                                                                         |         |

<sup>1</sup> Pelsser, L.M., et al., Effects of food on physical and sleep complaints in children with ADHD: a randomised controlled pilot study. Eur J Pediatr, 2010. 169(9): p. 1129-38

<sup>2</sup> Exact logistic regression model: Presence at T<sub>end</sub> = Presence at T<sub>start</sub> + ARS responder status + study

<sup>3</sup> NA=not available (maximum likelihood estimate does not exist)

<sup>4</sup> Incidence rate ratio based on Poisson regression model: Number present at T<sub>end</sub> = Number present at T<sub>start</sub> + ARS responder status + Study

<sup>5</sup> BRAIN study only (50 responders, 29 non-responders)

ARS=ADHD Rating Scale

INCA=Impact of Nutrition on Children with ADHD (a randomised controlled trial); BRAIN=Biomarker Research in ADHD; the Impact of Nutrition (an open trial)

Complaints in red font occurred in less than 5% of children (n=120), both at T<sub>start</sub> and at T<sub>end</sub>

**Table S3A. Stool type and frequency measured by the modified Bristol stool form scale for children<sup>1</sup> before (T<sub>start</sub>) and after (T<sub>end</sub>) following the few-foods diet, in the BRAIN study (n=79).**

| Stool type and frequency                    | T <sub>start</sub><br>Mean (SD) | T <sub>end</sub><br>Mean (SD) | T <sub>end</sub> - T <sub>start</sub><br>Mean difference (SD) | P-<br>value <sup>2</sup> | Cohen's d |
|---------------------------------------------|---------------------------------|-------------------------------|---------------------------------------------------------------|--------------------------|-----------|
| <b>Percentage normal type</b>               | 47.73 (26.12)                   | 57.52 (36.45)                 | 9.78 (37.22)                                                  | 0.0252                   | 0.31      |
| <b>Percentage hard type</b>                 | 39.87 (27.01)                   | 32.53 (33.60)                 | -7.34 (36.03)                                                 | 0.11                     | -0.24     |
| <b>Percentage watery type</b>               | 12.40 (16.06)                   | 9.95 (16.94)                  | -2.45 (17.54)                                                 | 0.22                     | -0.15     |
| <b>Stool count in the observation weeks</b> | 8.59 (2.91)                     | 5.04 (2.13)                   | -3.56 (3.06)                                                  | <0.0001                  | -1.39     |
| <b>Days without stool</b>                   | 0.92 (1.11)                     | 2.68 (1.57)                   | 1.76 (1.58)                                                   | <0.0001                  | 1.29      |

<sup>1</sup> Lane, M.M., et al., Reliability and validity of a modified Bristol Stool Form Scale for children. J Pediatr, 2011. 159(3): p. 437-441.e1

<sup>2</sup> Wilcoxon signed rank test

BRAIN= Biomarker Research in ADHD; the Impact of Nutrition (an open label trial)

**Table S3B. Association of stool type and frequency measured by the modified Bristol stool form scale for children<sup>1</sup>, with change in ADHD symptoms measured by the ADHD Rating Scale (ARS), before (T<sub>start</sub>) and after (T<sub>end</sub>) following the few-foods diet, in the BRAIN study (n=79).**

| Stool type and frequency                    | <u>ARS score decrease</u>           |                                 |            |                          |           |
|---------------------------------------------|-------------------------------------|---------------------------------|------------|--------------------------|-----------|
|                                             | ≥ 40% (responder)<br>(n=50)         | < 40% (non-responder)<br>(n=29) | Difference | P-<br>value <sup>2</sup> | Cohen's d |
| <b>Percentage normal type</b>               | Mean (SD)                           | Mean (SD)                       |            |                          |           |
|                                             | T <sub>start</sub><br>48.61 (25.86) | 46.20 (26.95)                   | 2.41       | 0.79                     | 0.09      |
|                                             | T <sub>end</sub><br>54.12 (39.51)   | 63.37 (30.52)                   | -9.26      | -                        | -         |
| Difference                                  | 5.50 (39.22)                        | 17.17 (32.84)                   |            | 0.17                     | -0.32     |
| P-value <sup>3</sup>                        | 0.31                                | 0.0075                          |            |                          |           |
| <b>Percentage hard type</b>                 | Mean (SD)                           | Mean (SD)                       |            |                          |           |
|                                             | T <sub>start</sub><br>38.62 (25.33) | 42.02 (30.04)                   | -3.39      | 0.85                     | -0.12     |
|                                             | T <sub>end</sub><br>33.99 (35.67)   | 30.01 (30.13)                   | 3.98       | -                        | -         |
| Difference                                  | -4.63 (37.56)                       | -12.01 (33.35)                  |            | 0.49                     | -0.47     |
| P-value <sup>3</sup>                        | 0.44                                | 0.09                            |            |                          |           |
| <b>Percentage watery type</b>               | Mean (SD)                           | Mean (SD)                       |            |                          |           |
|                                             | T <sub>start</sub><br>12.76 (15.46) | 11.78 (17.30)                   | 0.98       | 0.66                     | 0.06      |
|                                             | T <sub>end</sub><br>11.88 (19.31)   | 6.61 (11.36)                    | 5.27       | -                        | -         |
| Difference                                  | -0.87 (17.62)                       | -5.17 (17.38)                   |            | 0.41                     | 0.25      |
| P-value <sup>3</sup>                        | 0.71                                | 0.12                            |            |                          |           |
| <b>Stool count in the observation weeks</b> | Mean (SD)                           | Mean (SD)                       |            |                          |           |
|                                             | T <sub>start</sub><br>8.60 (3.05)   | 8.59 (2.71)                     | 0.01       | 0.86                     | 0.00      |
|                                             | T <sub>end</sub><br>5.10 (2.06)     | 4.93 (2.27)                     | 0.17       | -                        | -         |
| Difference                                  | -3.50 (3.18)                        | -3.66 (2.88)                    | 0.16       | 0.63                     | 0.05      |
| P-value <sup>3</sup>                        | <0.0001                             | <0.0001                         |            |                          |           |

<sup>1</sup> Lane, M.M., et al., Reliability and validity of a modified Bristol Stool Form Scale for children. J Pediatr, 2011. 159(3): p. 437-441.e1

<sup>2</sup> Kruskal-Wallis test

<sup>3</sup> Wilcoxon signed rank test

BRAIN= Biomarker Research in ADHD; the Impact of Nutrition (an open label trial)

**Table S4. Distribution and statistical analysis of presence of 21 physical complaints in children with and without an atopic constitution, participating in the INCA FFD group (n=41) and the BRAIN study (n=79). Data of one INCA participant is missing.**

| Physical complaint                                                        | Atopic constitution<br>(n=71) |                           | Non-atopic constitution<br>(n=48) |                           | Tstart<br>P-value <sup>1</sup> | Association of group (atopic<br>vs non-atopic) with complaint at T <sub>end</sub> |                   |           |
|---------------------------------------------------------------------------|-------------------------------|---------------------------|-----------------------------------|---------------------------|--------------------------------|-----------------------------------------------------------------------------------|-------------------|-----------|
|                                                                           | T <sub>start</sub><br>n (%)   | T <sub>end</sub><br>n (%) | T <sub>start</sub><br>n (%)       | T <sub>end</sub><br>n (%) |                                | Odds ratio <sup>2</sup>                                                           | P-value           | Cohen's d |
| Headache                                                                  | 6 (8.5)                       | 8 (11.3)                  | 6 (12.5)                          | 4 (8.3)                   | 0.54                           | 1.51                                                                              | 0.75              | 0.23      |
| Abdominal pain                                                            | 21 (29.6)                     | 15 (21.1)                 | 10 (20.8)                         | 5 (10.4)                  | 0.39                           | 2.08                                                                              | 0.29              | 0.40      |
| Growing pain                                                              | 5 (7.04)                      | 2 (2.8)                   | 5 (10.4)                          | 0 (0.00)                  | 0.52                           | 1.98                                                                              | 0.30              | 0.38      |
| Unusual thirst                                                            | 22 (40.0)                     | 9 (12.7)                  | 12 (25.0)                         | 3 (6.6)                   | 0.54                           | 2.01                                                                              | 0.49              | 0.39      |
| Unusual perspiration (at night or daytime)                                | 20 (28.3)                     | 5 (7.0)                   | 18 (37.5)                         | 7 (14.6)                  | 0.32                           | 0.52                                                                              | 0.47              | -0.36     |
| Often warm                                                                | 39 (54.9)                     | 12 (16.9)                 | 24 (50.0)                         | 9 (18.8)                  | 0.71                           | 0.81                                                                              | 0.87              | -0.12     |
| Eczema                                                                    | 5 (7.0)                       | 0 (0.0)                   | 0 (0.0)                           | 1 (1.4)                   | 0.08                           | NA                                                                                | NA                | NA        |
| Asthma                                                                    | 0 (0.0)                       | 0 (0.0)                   | 0 (0.0)                           | 0 (0.0)                   | NA <sup>3</sup>                | NA                                                                                | NA                | NA        |
| Persisting cold (rhinitis)                                                | 4 (5.6)                       | 0 (0.0)                   | 5 (10.4)                          | 2 (4.2)                   | 0.48                           | 0.44                                                                              | 0.28              | -0.45     |
| Blotches in the face                                                      | 0 (0.0)                       | 2 (2.8)                   | 1 (2.1)                           | 1 (2.1)                   | 0.40                           | 1.61                                                                              | 0.36              | 0.26      |
| Red edged mouth                                                           | 4 (5.6)                       | 5 (7.0)                   | 0 (0.0)                           | 1 (2.1)                   | 0.15                           | 2.96                                                                              | 0.61              | 0.60      |
| Red ears                                                                  | 1 (1.4)                       | 1 (1.4)                   | 3 (4.2)                           | 1 (2.1)                   | 1.00                           | 2.26                                                                              | 0.86              | 0.45      |
| Bags under eyes                                                           | 8 (11.4)                      | 8 (11.4)                  | 6 (12.5)                          | 4 (8.3)                   | 1.00                           | 1.49                                                                              | 0.79              | 0.22      |
| Often tired                                                               | 16 (22.5)                     | 27 (38.0)                 | 9 (18.8)                          | 11 (22.9)                 | 0.65                           | 2.01                                                                              | 0.14              | 0.39      |
| Diarrhoea                                                                 | 3 (4.2)                       | 0 (0.0)                   | 4 (8.3)                           | 2 (4.2)                   | 1.00                           | 0.29                                                                              | 0.17              | -0.68     |
| Constipation                                                              | 1 (1.4)                       | 2 (2.8)                   | 0 (0.0)                           | 1 (2.1)                   | 1.00                           | 0.68                                                                              | 1.00              | -0.21     |
| Flatulence                                                                | 1 (1.4)                       | 3 (4.2)                   | 0 (0.0)                           | 0 (0.0)                   | 1.00                           | 2.04                                                                              | 0.96              | 0.39      |
| Nausea/vomiting                                                           | 2 (2.8)                       | 2 (2.8)                   | 0 (0.0)                           | 1 (2.1)                   | 0.51                           | 1.40                                                                              | 1.00              | 0.19      |
| Problems sleeping in                                                      | 19 (26.8)                     | 12 (16.9)                 | 13 (27.1)                         | 5 (10.4)                  | 1.00                           | 1.80                                                                              | 0.46              | 0.32      |
| Problems sleeping on                                                      | 14 (19.7)                     | 5 (7.0)                   | 4 (8.3)                           | 1 (1.4)                   | 0.12                           | 2.65                                                                              | 0.69              | 0.54      |
| Nocturnal enuresis                                                        | 7 (9.9)                       | 2 (2.8)                   | 2 (4.2)                           | 1 (2.1)                   | 0.31                           | 0.45                                                                              | 1.00              | -0.44     |
| <b>Total number of physical complaints<br/>(average; minimum-maximum)</b> | 215<br>(3.0; 0-8)             | 123<br>(1.7; 0-8)         | 130<br>(2.7; 0-9)                 | 60<br>(1.3; 0-7)          | 0.29                           | 1.33 <sup>4</sup>                                                                 | 0.16 <sup>4</sup> | NA        |

<sup>1</sup> Fisher exact test

<sup>2</sup> Exact logistic regression model: Presence at T<sub>end</sub> = Presence at T<sub>start</sub> + atopic group

<sup>3</sup> NA=not available

<sup>4</sup> Incidence rate ratio and P-value based on Poisson regression model: Number present at T<sub>end</sub> = Number present at T<sub>start</sub> + treatment group  
Complaints in red font occurred in less than 5% of children (n=120), both at T<sub>start</sub> and at T<sub>end</sub>

Table S5. Distribution and statistical analysis of presence of 21 physical complaints, scored using the Physical Complaint Questionnaire<sup>1</sup>, in the few-foods diet (FFD) group and control group of the 2010 RCT<sup>1</sup> (n=24).

| Physical complaint                                                | FFD<br>(n=13)               |                           | Control<br>(n=11)           |                           | FFD vs Control<br>T <sub>start</sub><br>P-value <sup>2</sup> | Association of treatment<br>(FFD vs Control) with complaint at T <sub>end</sub> |                     |           |
|-------------------------------------------------------------------|-----------------------------|---------------------------|-----------------------------|---------------------------|--------------------------------------------------------------|---------------------------------------------------------------------------------|---------------------|-----------|
|                                                                   | T <sub>start</sub><br>n (%) | T <sub>end</sub><br>n (%) | T <sub>start</sub><br>n (%) | T <sub>end</sub><br>n (%) |                                                              | Odds Ratio (95% CI) <sup>3</sup>                                                | P-value             | Cohen's d |
| Headache                                                          | 2 (15.4)                    | 0 (0.0)                   | 5 (45.5)                    | 3 (27.3)                  | 0.18                                                         | 0.45 (0.00; 4.48)                                                               | 0.29                | -0.44     |
| Abdominal pain                                                    | 8 (61.5)                    | 1 (7.7)                   | 8 (72.7)                    | 5 (45.5)                  | 0.68                                                         | 0.10 (0.00; 1.47)                                                               | 0.12                | -1.27     |
| Growing pain                                                      | 0 (0.0)                     | 0 (0.0)                   | 0 (0.0)                     | 1 (9.1)                   | NA                                                           | 0.85 (0.00; 16.1)                                                               | 0.46                | -0.09     |
| Unusual thirst                                                    | 5 (38.5)                    | 0 (0.0)                   | 4 (36.4)                    | 3 (27.3)                  | 1.00                                                         | 0.12 (0.00; 0.97)                                                               | <b>0.0476</b>       | -1.17     |
| Unusual perspiration (at night or daytime)                        | 8 (61.5)                    | 0 (0.0)                   | 4 (36.4)                    | 2 (18.2)                  | 0.41                                                         | 0.16 (0.00; 1.53)                                                               | 0.09                | -1.01     |
| Often warm                                                        | 5 (38.5)                    | 3 (23.1)                  | 6 (54.5)                    | 6 (54.5)                  | 0.68                                                         | 0.21 (0.00; 3.23)                                                               | 0.40                | -0.86     |
| Eczema                                                            | 1 (7.7)                     | 0 (0.0)                   | 5 (45.5)                    | 5 (45.5)                  | 0.06                                                         | 0.20 (0.00; 3.80)                                                               | 0.17                | -0.89     |
| Asthma                                                            | 1 (7.7)                     | 1 (7.7)                   | 1 (9.1)                     | 1 (9.1)                   | 1.00                                                         | NA <sup>4</sup>                                                                 | NA                  | NA        |
| Persisting cold (rhinitis)                                        | 1 (7.7)                     | 0 (0.0)                   | 1 (9.1)                     | 0 (0.0)                   | 1.00                                                         | NA                                                                              | NA                  | NA        |
| Blotches in the face                                              | 1 (7.7)                     | 0 (0.0)                   | 3 (27.3)                    | 3 (27.3)                  | 0.30                                                         | 0.33 (0.00-6.33)                                                                | 0.25                | -0.61     |
| Red edged mouth                                                   | 1 (7.7)                     | 0 (0.0)                   | 2 (18.2)                    | 2 (18.2)                  | 0.58                                                         | 0.50 (0.00-9.50)                                                                | 0.33                | -0.38     |
| Red ears                                                          | 2 (15.4)                    | 0 (0.0)                   | 3 (27.3)                    | 3 (27.3)                  | 0.63                                                         | 0.16 (0.00-1.71)                                                                | 0.10                | -1.01     |
| Bags under eyes                                                   | 8 (61.5)                    | 4 (36.4) <sup>5</sup>     | 3 (27.3)                    | 3 (27.3)                  | 0.12                                                         | 0.48 (0.00; 4.05)                                                               | 0.29                | -0.41     |
| Often tired                                                       | 9 (69.2)                    | 4 (33.3) <sup>6</sup>     | 3 (27.3)                    | 4 (36.4)                  | 0.10                                                         | 0.24 (0.00; 1.63)                                                               | 0.12                | -0.79     |
| Diarrhoea                                                         | 2 (15.4)                    | 0 (0.0)                   | 3 (27.3)                    | 3 (27.3)                  | 0.63                                                         | 0.16 (0.00; 1.71)                                                               | 0.10                | -1.01     |
| Constipation                                                      | 1 (7.7)                     | 1 (7.7)                   | 0 (0.0)                     | 0 (0.0)                   | 1.00                                                         | NA                                                                              | NA                  | NA        |
| Flatulence                                                        | 3 (23.1)                    | 1 (7.7)                   | 3 (27.3)                    | 3 (27.3)                  | 1.00                                                         | 0.30 (0.00; 3.11)                                                               | 0.20                | -0.66     |
| Nausea/vomiting                                                   | 1 (7.7)                     | 0 (0.0)                   | 0 (0.0)                     | 0 (0.0)                   | 1.00                                                         | NA                                                                              | NA                  | NA        |
| Problems sleeping in                                              | 4 (30.8)                    | 1 (7.7)                   | 4 (36.4)                    | 4 (36.4)                  | 1.00                                                         | 0.15 (0.00; 1.26)                                                               | 0.07                | -1.05     |
| Problems sleeping on                                              | 2 (15.4)                    | 0 (0.0)                   | 2 (18.2)                    | 2 (18.2)                  | 1.00                                                         | 0.24 (0.00; 2.80)                                                               | 0.17                | -0.79     |
| Nocturnal enuresis                                                | 3 (23.1)                    | 0 (0.0)                   | 0 (0.0)                     | 0 (0.0)                   | 0.22                                                         | NA                                                                              | NA                  | NA        |
| <b>Total number of physical complaints<br/>(average; min-max)</b> | 68<br>(5.23; 2-10)          | 16<br>(1.23; 0-4)         | 60<br>(4.64; 0-13)          | 53<br>(4.82; 0-12)        | 0.27                                                         | 0.33 <sup>7</sup> (0.17; 0.66)                                                  | 0.0014 <sup>7</sup> | NA        |

<sup>1</sup> Pelsser, L.M., et al., Effects of food on physical and sleep complaints in children with ADHD: a randomised controlled pilot study. Eur J Pediatr, 2010. 169(9): p. 1129-38

<sup>2</sup> Fisher exact test

<sup>3</sup> Exact logistic regression model: Presence at T<sub>end</sub> = Presence at T<sub>start</sub> + treatment group

<sup>4</sup> NA=not available (maximum likelihood estimate does not exist)

<sup>5</sup> n=11 due to 2 missing values

<sup>6</sup> n=12 due to 1 missing value

<sup>7</sup> Incidence rate ratio and P-value based on Poisson regression model: Number present at T<sub>end</sub> = Number present at T<sub>start</sub> + treatment group  
RCT=randomised controlled trial
